# Supplementary material for: Performance optimization of GaAs NCFET with a complex oxide ferroelectric gate
Source: Research Square preprint supplement (doi:10.21203/rs.3.rs-4120744/v1), 2024-04-18
Supplement: Supplementary file 1 [file 168a34d9b509f38ce555c639.docx]

Supporting information

**Performance optimization of GaAs NCFET with a complex oxide ferroelectric gate**

Tingting Jia1,2*, Henghui Li2,3, Ziwei Yu2, Chong Zhang1,2,Hongyang Zhao4, Quansheng Guo1*

1. School of materials science and engineering, Hubei University, Wuhan 430205, China.
2. Shenzhen Institute of Advanced Electronic Materials, Shenzhen Institutes of Advanced Technology, Chinese Academy of Sciences, Guangdong 518055, China.

School of Microelectronics, Southeastern University, Nanjing 10286, China.

1. Hubei Key Laboratory of Plasma Chemistry and Advanced Materials, Department of Materials Science and Engineering, Wuhan Institute of Technology, Wuhan 430205, China.


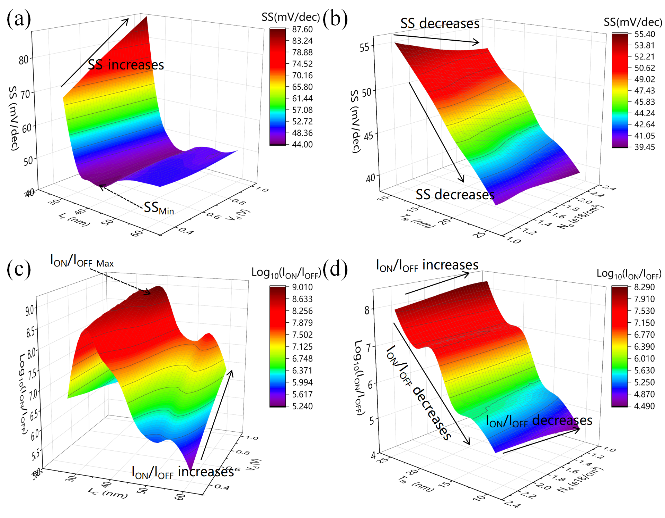


Figure S1. Transfer performance of the NCFET: (a) SS with *Vd* varied from 0.4 V to 1 V and *LC* varied from 25 nm to 60 nm; (b) SS with *Tfe* varied from 10 nm to 25 nm and *Nd* varied from 1×1018 /cm3 to 2×1018 /cm3; (c) *ION/IOFF* with *Vd* varied from 0.4 V to 1 V and *LC* varied from 25 nm to 60 nm; (d) *ION/IOFF* with *Tfe* varied from 10 nm to 25 nm and *Nd* varied from 1×1018 /cm3 to 2×1018 /cm3.
